# Supplementary material
Source: bioRxiv or medRxiv preprint supplement (https://www.biorxiv.org/highwire/filestream/76165/field_highwire_adjunct_files/0/241679-1.pdf)
Supplement: Supplementary file [file 241679-1.pdf]

**Table S1**

| <b>Experiment Type</b> | <b>Foraging Group Name</b> | <b>Month</b> | <b>Year</b> | <b>Number of Foragers</b> | <b>Number of Foragers Removed</b> | <b>Colony</b> |
|------------------------|----------------------------|--------------|-------------|---------------------------|-----------------------------------|---------------|
| Consistency + Removal  | H1                         | January      | 2014        | 8                         | 2                                 | 1             |
| Consistency + Removal  | H2                         | January      | 2014        | 11                        | 4                                 | 1             |
| Consistency + Removal  | H3                         | February     | 2014        | 7                         | 3                                 | 1             |
| Consistency + Removal  | H4                         | February     | 2014        | 10                        | 4                                 | 1             |
| Consistency + Removal  | H5                         | April        | 2014        | 9                         | 2                                 | 2             |
| Consistency + Removal  | H6                         | February     | 2016        | 12                        | 4                                 | 3             |
| Consistency + Removal  | H7                         | April        | 2016        | 8                         | 3                                 | 4             |
| Consistency + Removal  | H8                         | September    | 2016        | 8                         | 4                                 | 5             |
| Consistency + Removal  | L1                         | October      | 2016        | 10                        | 3                                 | 6             |
| Consistency + Removal  | L2                         | November     | 2016        | 12                        | 4                                 | 7             |
| Consistency + Removal  | L3                         | November     | 2016        | 11                        | 4                                 | 7             |
| Consistency + Removal  | L4                         | January      | 2017        | 11                        | 4                                 | 8             |
| Addition               | A1                         | March        | 2016        | 7                         | NA                                | 4             |
| Addition               | A2                         | May          | 2017        | 6                         | NA                                | 9             |
| Addition               | A3                         | June         | 2017        | 11                        | NA                                | 9             |
| Addition               | A4                         | June         | 2017        | 8                         | NA                                | 9             |

Table S1: The experiments done, when it was done, the foraging group size, the number of foragers removed (in the case of removal experiments) and the colony to which the foraging group belonged to.

Table S2

| Predictor                        | Number of Models Present In | Model Numbers              |
|----------------------------------|-----------------------------|----------------------------|
| Colony Experience                | 5                           | 1,7,8(*),9(*),10(*), 11(*) |
| Year                             | 1                           | 2                          |
| Month                            | 3                           | 2,7,8(*)                   |
| Foraging Group Size              | 5                           | 3,9(*),12(*),14,15         |
| Number of Foragers Removed       | 5                           | 3,10(*),13(*),16,17        |
| Proportion of Foragers Removed   | 6                           | 4,11(*),12(*),13(*),18,19  |
| Average Circuits (Pre-Removal)   | 5                           | 5,14,16,18,20              |
| Average Intensity (Pre-Removal)  | 5                           | 5,14,16,18,20              |
| Average Trips (Pre-Removal)      | 5                           | 5,14,16,18,20              |
| Average Circuits (Post-Removal)  | 5                           | 6,15,17,19,20              |
| Average Intensity (Post-Removal) | 5                           | 6,15,17,19,20              |
| Average Trips (Post-Removal)     | 5                           | 6,15,17,19,20              |

Table S2: Predictors used for model comparisons along with the number of models they are present in and the model numbers. Model numbers with (\*) indicate that an interaction term is present in the model between the two predictors.

Table S3

| Predictor                      | Effect Size | Confidence Interval | p Value | Relative Importance of Predictor | Models Containing Predictor | AICc | dAIC of Model containing Predictor | Cumulative Weight |
|--------------------------------|-------------|---------------------|---------|----------------------------------|-----------------------------|------|------------------------------------|-------------------|
| Proportion of Foragers Removed | -0.981      | -5.560 – 3.589      | 0.675   | 0.53                             | 1                           | 24.7 | 0.00                               | 0.494             |
| Colony Experience              | -0.023      | -0.371 – 0.325      | 0.897   | 0.47                             | 1                           | 25.0 | 0.24                               | 0.437             |

Table S3: Important predictors, effect sizes, confidence intervals, p Values, relative importance, the number of models the predictor is present in, the AICc, dAIC and cumulative weight of the model for the difference in intensity of foraging groups.

Table S4

| Predictor                      | Effect Size | Confidence Interval | p Value | Relative Importance of Predictor | Models Containing Predictor | AICc | dAIC of Model containing Predictor | Cumulative Weight |
|--------------------------------|-------------|---------------------|---------|----------------------------------|-----------------------------|------|------------------------------------|-------------------|
| Proportion of Foragers Removed | 4.615       | -0.905 – 10.135     | 0.101   | 0.49                             | 1                           | 29.2 | 0.00                               | 0.473             |
| Colony Experience              | 0.307       | -0.123 – 0.737      | 0.161   | 0.32                             | 1                           | 30.1 | 0.86                               | 0.307             |
| Foraging Group Size            | -0.322      | -0.616 – -0.029     | 0.032   | 0.18                             | 1                           | 31.2 | 1.98                               | 0.176             |
| Number of Foragers Removed     | 0.485       | 0.149 – 1.119       | 0.134   | 0.18                             | 1                           | 31.2 | 1.98                               | 0.018             |

Table S4: Important predictors, effect sizes, confidence intervals, p Values, relative importance, the number of models the predictor is present in, the AICc, dAIC and cumulative weight of the model for the difference in circuits/trips of foraging groups.

Table S5

| Bee Number | Foraging Group | Probability  |                  | Intensity     |                  | Circuits/Trips |                  |
|------------|----------------|--------------|------------------|---------------|------------------|----------------|------------------|
|            |                | Difference   | p Value          | Difference    | p Value          | Difference     | p Value          |
| 1          | H1             | 0.087        | 0.998            | 0.193         | 0.989            | 0.269          | 0.961            |
| <b>2</b>   | <b>H1</b>      | <b>1.757</b> | <b>&lt;0.001</b> | -0.391        | 0.738            | <b>1.248</b>   | <b>0.001</b>     |
| <b>3</b>   | <b>H1</b>      | <b>1.512</b> | <b>&lt;0.001</b> | -0.048        | 1.000            | <b>1.340</b>   | <b>&lt;0.001</b> |
| <b>4</b>   | <b>H1</b>      | -0.300       | 0.531            | <b>-1.482</b> | <b>&lt;0.001</b> | <b>-1.090</b>  | <b>0.006</b>     |
| <b>5</b>   | <b>H1</b>      | -0.482       | 0.072            | <b>-2.132</b> | <b>&lt;0.001</b> | -0.476         | 0.630            |
| 6          | H1             | -0.271       | 0.646            | -0.246        | 0.962            | -0.418         | 0.756            |
| 7          | H2             | -0.039       | 1.000            | -0.435        | 0.973            | -0.286         | 0.998            |
| 8          | H2             | 0.548        | 0.925            | 0.705         | 0.742            | 1.045          | 0.310            |
| <b>9</b>   | <b>H2</b>      | <b>1.458</b> | <b>0.047</b>     | 0.524         | 0.929            | 1.330          | 0.089            |
| 10         | H2             | 0.334        | 0.995            | -0.175        | 1.000            | 0.120          | 1.000            |
| 11         | H2             | 1.073        | 0.284            | -0.030        | 1.000            | 1.164          | 0.193            |
| <b>12</b>  | <b>H2</b>      | <b>1.595</b> | <b>0.021</b>     | -0.478        | 0.956            | 1.022          | 0.336            |
| 13         | H2             | 0.660        | 0.825            | -0.411        | 0.981            | 0.375          | 0.990            |
| <b>14</b>  | <b>H3</b>      | <b>2.245</b> | <b>&lt;0.001</b> | 0.693         | 0.158            | <b>2.286</b>   | <b>&lt;0.001</b> |
| 15         | H3             | 0.419        | 0.199            | -0.673        | 0.180            | -0.019         | 1.000            |
| <b>16</b>  | <b>H3</b>      | <b>0.904</b> | <b>&lt;0.001</b> | -0.696        | 0.156            | 0.188          | 0.908            |
| 17         | H3             | 0.407        | 0.224            | 0.528         | 0.405            | 0.222          | 0.845            |
| <b>18</b>  | <b>H4</b>      | <b>2.281</b> | <b>&lt;0.001</b> | 0.385         | 0.931            | <b>2.164</b>   | <b>&lt;0.001</b> |
| <b>19</b>  | <b>H4</b>      | <b>1.483</b> | <b>&lt;0.001</b> | -0.417        | 0.902            | <b>1.365</b>   | <b>0.001</b>     |
| <b>20</b>  | <b>H4</b>      | <b>0.758</b> | <b>0.014</b>     | -0.363        | 0.947            | 0.309          | 0.947            |
| <b>21</b>  | <b>H4</b>      | <b>0.794</b> | <b>0.009</b>     | -0.383        | 0.933            | 0.208          | 0.993            |
| 22         | H4             | 0.511        | 0.218            | -0.348        | 0.956            | 0.143          | 0.999            |
| 23         | H4             | 0.276        | 0.846            | 0.625         | 0.586            | 0.176          | 0.997            |
| 24         | H5             | 0.155        | 1.000            | 0.349         | 0.982            | 0.439          | 0.937            |
| 25         | H5             | -0.367       | 0.987            | 1.100         | 0.092            | -0.083         | 1.000            |
| 26         | H5             | -0.322       | 0.994            | 0.376         | 0.972            | -0.084         | 1.000            |
| 27         | H5             | 0.730        | 0.656            | 0.628         | 0.703            | 1.067          | 0.113            |
| 28         | H5             | -0.341       | 0.991            | -0.449        | 0.928            | -0.455         | 0.924            |
| 29         | H5             | -0.041       | 1.000            | -0.936        | 0.226            | -0.051         | 1.000            |
| 30         | H5             | 0.595        | 0.841            | 0.064         | 1.000            | 0.384          | 0.969            |
| 31         | H6             | -0.278       | 1.000            | -0.587        | 0.900            | -0.672         | 0.865            |
| 32         | H6             | -0.884       | 0.639            | -0.975        | 0.369            | -1.153         | 0.254            |
| 33         | H6             | 0.124        | 1.000            | -1.149        | 0.178            | -0.586         | 0.933            |
| 34         | H6             | -0.637       | 0.912            | -1.169        | 0.162            | -0.930         | 0.532            |
| 35         | H6             | -0.261       | 1.000            | 0.027         | 1.000            | -0.242         | 1.000            |
| <b>36</b>  | <b>H6</b>      | -0.666       | 0.890            | <b>-1.455</b> | <b>0.034</b>     | -1.266         | 0.158            |
| 37         | H6             | 0.029        | 1.000            | -0.388        | 0.991            | -0.201         | 1.000            |
| 38         | H6             | -0.254       | 1.000            | -0.562        | 0.920            | -0.330         | 0.998            |
| 39         | H7             | 0.687        | 0.606            | -0.592        | 0.467            | 0.497          | 0.890            |
| <b>40</b>  | <b>H7</b>      | <b>1.686</b> | <b>0.004</b>     | -0.181        | 0.993            | <b>1.487</b>   | <b>0.029</b>     |
| 41         | H7             | 0.687        | 0.606            | -0.360        | 0.876            | 0.147          | 1.000            |
| 42         | H7             | 0.359        | 0.960            | -0.277        | 0.956            | 0.485          | 0.900            |
| <b>43</b>  | <b>H7</b>      | <b>1.555</b> | <b>0.027</b>     | 0.740         | 0.348            | 1.129          | 0.274            |
| 44         | H8             | 0.976        | 0.154            | -1.484        | 0.064            | -0.037         | 1.000            |
| 45         | H8             | 0.980        | 0.151            | -0.591        | 0.809            | 0.316          | 0.978            |

|    |           |               |                  |               |              |               |                  |
|----|-----------|---------------|------------------|---------------|--------------|---------------|------------------|
| 46 | H8        | <b>1.840</b>  | <b>&lt;0.001</b> | -0.588        | 0.812        | 1.348         | 0.125            |
| 47 | H8        | 0.959         | 0.167            | 0.176         | 0.997        | 0.982         | 0.400            |
| 48 | L1        | -0.633        | 0.914            | -0.695        | 0.660        | -1.051        | 0.325            |
| 49 | L1        | 0.096         | 1.000            | -0.716        | 0.625        | -0.352        | 0.994            |
| 50 | L1        | 0.248         | 1.000            | -1.145        | 0.105        | -0.652        | 0.843            |
| 51 | L1        | 0.014         | 1.000            | -0.620        | 0.773        | -0.435        | 0.979            |
| 52 | <b>L1</b> | -0.827        | 0.733            | <b>-1.364</b> | <b>0.028</b> | -1.330        | 0.100            |
| 53 | L1        | -0.597        | 0.935            | -0.175        | 1.000        | -0.616        | 0.878            |
| 54 | <b>L1</b> | <b>-1.625</b> | <b>0.049</b>     | <b>-1.525</b> | <b>0.009</b> | <b>-1.712</b> | <b>0.012</b>     |
| 55 | <b>L2</b> | <b>-1.181</b> | <b>0.010</b>     | <b>-1.418</b> | <b>0.001</b> | -0.696        | 0.153            |
| 56 | L2        | -0.309        | 0.983            | -0.413        | 0.897        | -0.382        | 0.838            |
| 57 | <b>L2</b> | 0.916         | 0.096            | 0.517         | 0.721        | <b>0.880</b>  | <b>0.027</b>     |
| 58 | L2        | 0.917         | 0.096            | 0.002         | 1.000        | 0.475         | 0.620            |
| 59 | <b>L2</b> | <b>1.207</b>  | <b>0.008</b>     | <b>-1.022</b> | <b>0.033</b> | 0.303         | 0.950            |
| 60 | <b>L2</b> | <b>1.361</b>  | <b>0.002</b>     | 0.468         | 0.814        | <b>1.673</b>  | <b>&lt;0.001</b> |
| 61 | <b>L2</b> | <b>1.026</b>  | <b>0.041</b>     | 0.163         | 1.000        | 0.544         | 0.443            |
| 62 | L2        | 0.505         | 0.774            | 0.086         | 1.000        | 0.297         | 0.956            |
| 63 | L3        | -0.137        | 1.000            | -0.936        | 0.193        | -0.474        | 0.524            |
| 64 | L3        | -0.977        | 0.075            | -0.654        | 0.622        | -0.622        | 0.198            |
| 65 | L3        | -0.186        | 0.999            | -0.278        | 0.994        | -0.214        | 0.986            |
| 66 | <b>L3</b> | 0.836         | 0.191            | <b>-1.194</b> | <b>0.039</b> | -0.217        | 0.985            |
| 67 | <b>L3</b> | -0.484        | 0.805            | <b>-1.410</b> | <b>0.008</b> | <b>-0.864</b> | <b>0.019</b>     |
| 68 | L3        | 0.877         | 0.148            | -0.307        | 0.989        | 0.267         | 0.953            |
| 69 | <b>L3</b> | <b>1.179</b>  | <b>0.015</b>     | -0.121        | 1.000        | 0.565         | 0.302            |
| 70 | <b>L4</b> | 1.240         | 0.134            | 0.395         | 0.743        | <b>1.284</b>  | <b>0.031</b>     |
| 71 | L4        | 0.592         | 0.887            | 0.718         | 0.093        | 0.814         | 0.404            |
| 72 | L4        | 1.110         | 0.237            | 0.262         | 0.960        | 0.981         | 0.190            |
| 73 | L4        | 0.393         | 0.987            | -0.292        | 0.930        | 0.062         | 1.000            |
| 74 | <b>L4</b> | <b>1.662</b>  | <b>0.013</b>     | 0.721         | 0.091        | 1.069         | 0.119            |
| 75 | L4        | 0.200         | 1.000            | -0.383        | 0.855        | -0.181        | 1.000            |
| 76 | L4        | -1.367        | 0.149            | 0.408         | 0.811        | -0.249        | 0.999            |

Table S5: Difference in average scaled dance activity between Post and Pre Removal conditions for 76 foragers in 3 parameters along with single step adjusted p values. Foragers which show a significant change in at least one parameter as well as the parameter in which they show the change are highlighted in bold.
